# Supplementary material
Source: Springer Nature journal article supplement (https://www.springermedizin.de/resource/supplementary/13054_2012_982_MOESM3_ESM.pdf/9709746)
Supplement: MOESM3 [file 9709746]

**282832 patients hospitalized  
at two medical centers  
between August 2007 and July 2010**

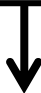

**1803 patients (over age 18)  
diagnosed with severe hyperkalemia  
(serum K  $\geq$  6.5 mEq/L)**

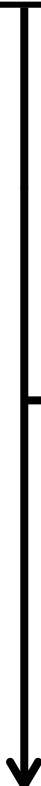

- **279: patients with laboratory errors such as hemolysis**
- **150: patients with several conditions causing pseudo-hyperkalemia**
- **391: patients admitted for palliative cares (with documented DNR)**
- **24: ESRD patients admitted for planned RRT**
- **36: ESRD patients admitted for procedures**

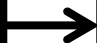

**923 study patients**
